# Supplementary material for: Anoxic photocatalytic treatment of synthetic mining wastewater using TiO2 and scavengers for complexed cyanide recovery
Source: Royal Society of Chemistry journal article supplement (doi:10.1039/c8pp00281a), 2018-08-31
Supplement: c8pp00281a1.pdf [file c8pp00281a1.pdf]

**SUPPLEMENTARY INFORMATION 1. Actinometrical comparison with other systems.**

Table 1. Reported actinometrical measurement in other photoreactors.

| Type of photoreactor / Source of Light                    | Actinometrical measurement method | Wavelength (nm) | Photon flux               | Ref. |
|-----------------------------------------------------------|-----------------------------------|-----------------|---------------------------|------|
| Batch 250 mL / UV Hg Lamp 125W                            | Hydrogen peroxide                 | 305             | 0,57 $\mu\text{E s}^{-1}$ | 1    |
| Batch 1 L / UV Hg Lamp 150W                               | Potassium ferrioxalate            | >300            | 13,7 $\mu\text{E s}^{-1}$ | 2    |
| CSTR 1000 mL / Hg Lamp 400 W                              | Potassium ferrioxalate            | 370             | 1,77 $\mu\text{E s}^{-1}$ | 3    |
| Batch 3 L / UV Hg Lamp 8W                                 | Potassium ferrioxalate            | 253             | 0,8 $\mu\text{E s}^{-1}$  | 4    |
| Microreactor 0,81 mL / Hg Lamp                            | Potassium Ferrioxalate            | 365             | 4,07 $\mu\text{E s}^{-1}$ | 5    |
| Microreactor 0,51 mL / LED UV                             | Potassium Ferrioxalate            | 365             | 0,38 $\mu\text{E s}^{-1}$ |      |
| Batch 225 mL / Hg lamp                                    | Potassium Ferrioxalate            | 365             | 7,40 $\mu\text{E s}^{-1}$ |      |
| Batch 250 mL / Mercury UVA                                | Potassium Ferrioxalate            | 350-400         | 0,51 $\mu\text{E s}^{-1}$ | 6    |
| Batch 25 mL / Hg Lamp                                     | Potassium Ferrioxalate            | 365             | 0,63 $\mu\text{E s}^{-1}$ | 7    |
| CSTR 100 mL / LED UV-A                                    | UV Photodetector                  | 375             | 0,76 $\mu\text{E s}^{-1}$ | 8    |
| Batch 150 mL / LED UV-A                                   | Potassium Ferrioxalate            | 365             | 3,32 $\mu\text{E s}^{-1}$ | 9    |
| <b>This photoreactor (mini-CPC 500 mL / LED UV-A 30W)</b> | Potassium Ferrioxalate            | 365             | 2,41 $\mu\text{E s}^{-1}$ | 10   |

## SUPPLEMENTARY INFORMATION 2. Photocatalytic information of preliminary degradation.

As it can be seen in Figure 2, Fe elimination was not significant, about 4.27% > 3.45% > 3.44 % > 2.9% for FA+t-ButOH > FA+MetOH > t-ButOH > FA respectively. The largest degradation of the cyanocomplex was obtained for the addition of MetOH (73.7%), followed by the combination of FA+MetOH (72.2%), FA+t-ButOH (65.5%) and with no-scavengers (photocatalysis) (65%). Also, the increase of free cyanide appears in all scavengers combinations. This free cyanide increase is related to the rupture of the complex, and at the beginning of the process, the initial free cyanide was less than 0.5 ppm. So, the largest free cyanide liberation was in the order MetOH > FA+MetOH > photocatalysis > FA+tButOH.

On the other hand, the iron cyanocomplex degradation was significant compared to a typical photocatalytic degradation in anoxic conditions. Some  $h^+/OH^\bullet$  scavenger couples combination showed better results in the path change for the photocatalytic degradation. Only methanol as  $OH^\bullet$  acceptor, degraded the complex in 74%, meanwhile for the other scavengers, the degradation increases in the order EDTA>Formic Acid>t-ButOH. However, for the scavenger couples  $h^+/OH^\bullet$  the cyanocomplex degradation increased in the order FA+t-ButOH>FA+MetOH>EDTA+MetOH.

If it is considered that the removal of Fe from the complex implies a complete decomposition of the cyanocomplex, better result was achieved in the order FA+tButOH>FA+MetOH>t-ButOH>FA. Due to the need of not only degrade the complex, but to remove the metal from solution, the mix of FA + t-ButOH was chosen as the best scavenger coupled for their positive synergistic effect in terms of Fe removal.

### SUPPLEMENTARY INFORMATION 3. Electric Efficiency of Oxidation $E_{Eo}$ .

For a pseudo apparent kinetic analysis of first order, it was considered the Fe removal (Eq – 1, 2), according to the metal photoreductive studies <sup>11-15</sup>:

$$-\frac{dC}{dt} = k' C \quad (\text{Eq – 1})$$

$$\ln(C_0/C) = k' t \quad (\text{Eq – 2})$$

Where  $k'$  is the pseudo-first order constant ( $\text{min}^{-1}$ ),  $C_0$  and  $C$  the initial and final concentration respectively, of Fe in the solution.

Electric consumption is one of the most important, making the Electric Efficient of Oxidation per order one of the standards by the IUPAC. In the photocatalytic process with artificial light, the cost of illumination may be one of the most relevant <sup>16</sup>. The *Electric energy per order* ( $E_{Eo}$ ) is defined as the electric energy required to degrade 90% per unit of volume <sup>17</sup>. It can be estimated by (Eq – 3):

$$E_{Eo} = \frac{1000 P t}{60 V \log_{10}(C_0/C)} \quad (\text{Eq – 3})$$

Where  $P$  is the Power of the illumination [kW], calculated as voltage x amperes;  $V$  the liquid volume treated [L], and  $t$  the time [h]. According to the kinetic previously exposed in (Eq – 2), The Eq – 3 can be expressed as:

$$\ln(C_0/C) = 0,4343 \ln(C_0/C) = 0,4343 k' t$$

Then:

$$E_{Eo} = \frac{38,4P}{V k'} \quad (\text{Eq – 4})$$

## REFERENCES

- 1 M. Canterino, I. Di Somma, R. Marotta and R. Andreatti, Kinetic investigation of Cu(II) ions photoreduction in presence of titanium dioxide and formic acid., *Water Res.*, 2008, **42**, 4498–506.
- 2 M. J. López-Muñoz, J. Aguado, R. van Grieken and J. Marugán, Simultaneous photocatalytic reduction of silver and oxidation of cyanide from dicyanoargentate solutions, *Appl. Catal. B Environ.*, 2009, **86**, 53–62.
- 3 M. L. Satuf, M. J. Pierrestegui, L. Rossini, R. J. Brandi and O. M. Alfano, Kinetic modeling of azo dyes photocatalytic degradation in aqueous TiO<sub>2</sub> suspensions. Toxicity and biodegradability evaluation, *Catal. Today*, , DOI:10.1016/j.cattod.2010.11.018.
- 4 L. D. C. Cid, M. D. C. Grande, E. O. Acosta and B. Ginzberg, Removal of Cr(VI) and humic acid by heterogeneous photocatalysis in a laboratory reactor and a pilot reactor, *Ind. Eng. Chem. Res.*, 2012, **51**, 9468–9474.
- 5 T. Aillet, K. Loubiere, O. Dechy-Cabaret and L. Prat, Accurate Measurement of the Photon Flux Received Inside Two Continuous Flow Microphotoreactors by Actinometry, *Int. J. Chem. React. Eng.*, 2014, **12**, 1–13.
- 6 M. Valari, A. Antoniadis, D. Mantzavinos and I. Poulios, Photocatalytic reduction of Cr ( VI ) over titania suspensions, *Catal. Today*, 2015, **252**, 190–194.
- 7 C. Karunakaran, D. Vasumathi and P. Vinayagamoorthy, Enhanced photocatalytic Fe<sup>3+</sup> reduction with H<sub>2</sub>O<sub>2</sub> generation by TiO<sub>2</sub> anatase / rutile blend, *Indian J. Chemistry*, 2015, **54**, 1076–1084.
- 8 L. C. Ferreira, M. S. Lucas, J. R. Fernandes and P. B. Tavares, Photocatalytic oxidation of Reactive Black 5 with UV-A LEDs, *J. Environ. Chem. Eng.*, 2016, **4**, 109–114.
- 9 K. Davididou, J. M. Monteagudo, E. Chatzisyneon, A. Durán and A. J. Expósito, Degradation and mineralization of antipyrine by UV-A LED photo-Fenton reaction intensified by ferrioxalate with addition of persulfate, , DOI:10.1016/j.seppur.2016.08.021.
- 10 L. A. Betancourt Buitrago, O. Ossa Echeverry, J. C. Rodríguez Vallejo, C. Vásquez, L. Veitia, J. Barraza, M. Nilson and F. Machuca, An approach to the utilization of artificial high power LED UV-A radiation in photoreactors for methylene blue degradation, *Photochem. Photobiol.*, 2017, **16**, 79–85.
- 11 M. A. Barakat, Y. T. Chen and C. P. Huang, Removal of toxic cyanide and Cu(II) ions from water by illuminated TiO<sub>2</sub> catalyst, *Appl. Catal. B Environ.*, 2004, **53**, 13–20.
- 12 M. Samarghandi, J. Yang, O. Giahí and M. Shirzad-siboni, Photocatalytic reduction of hexavalent chromium with illuminated amorphous FeOOH, *Environmental Technol.*, 2014, 37–41.
- 13 J. K. Yang, S. M. Lee, M. Farrokhi, O. Giahí and M. S. Siboni, Photocatalytic removal of Cr ( VI ) with illuminated TiO<sub>2</sub>, *Desalin. Water Treat.*, 2012, 37–41.
- 14 X. Wang, S. O. Pehkonen and A. K. Ray, Removal of Aqueous Cr(VI) by a Combination of Photocatalytic Reduction and Coprecipitation, *Ind. Eng. Chem. Res.*, 2004, **43**, 1665–1672.
- 15 D. D. Kuhn and T. C. Young, Photolytic degradation of hexacyanoferrate (II) in aqueous media: The determination of the degradation kinetics, *Chemosphere*, 2005, **60**, 1222–1230.
- 16 N. Daneshvar, A. Aleboyeh and A. R. Khataee, The evaluation of electrical energy per order ( E Eo ) for photooxidative decolorization of four textile dye solutions by the kinetic model, *Chemosphere*, 2005, **59**, 761–767.
- 17 J. R. Bolton, K. G. Bircher, W. Tumas and C. A. Tolman, FIGURES-OF-MERIT FOR THE TECHNICAL DEVELOPMENT AND APPLICATION OF ADVANCED ELECTRIC- AND SOLAR-DRIVEN SYSTEMS, *IUPAC*, 2001, **73**, 627–637.
